## Correction

# Correction: Identification and Characterization of Seminal Fluid Proteins in the Asian Tiger Mosquito, *Aedes albopictus*

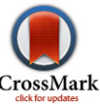

The *PLOS Neglected Tropical Diseases* Staff

## Notice of Republication

This article was republished on June 25, 2014 to correct an error in Table 1 that was introduced when the article was originally published online. In the original publication, Table 1 was only incorrect when viewing the article directly on the website. The original PDF download published contained the correct Table 1.

## Reference

1. Boes KE, Ribeiro JMC, Wong A, Harrington LC, Wolfner MF, et al. (2014) Identification and Characterization of Seminal Fluid Proteins in the Asian Tiger Mosquito, *Aedes albopictus*. *PLoS Negl Trop Dis* 8(6): e2946. doi:10.1371/journal.pntd.0002946

**Citation:** The *PLOS Neglected Tropical Diseases* Staff (2014) Correction: Identification and Characterization of Seminal Fluid Proteins in the Asian Tiger Mosquito, *Aedes albopictus*. *PLoS Negl Trop Dis* 8(7): e3073. doi:10.1371/journal.pntd.0003073

**Published** July 9, 2014

**Copyright:** © 2014 The *PLOS Neglected Tropical Diseases* Staff. This is an open-access article distributed under the terms of the Creative Commons Attribution License, which permits unrestricted use, distribution, and reproduction in any medium, provided the original author and source are credited.
